# Supplementary material for: SCARB2 drives hepatocellular carcinoma tumor initiating cells via enhanced MYC transcriptional activity
Source: Springer Nature journal article supplement (doi:10.1038/s41467-023-41593-z), 2023-09-22
Supplement: 41467_2023_41593_MOESM1_ESM.pdf [file 41467_2023_41593_MOESM1_ESM.pdf]

## Supplementary information

### **SCARB2 drives hepatocellular carcinoma tumour initiating cells via enhanced MYC transcriptional activity**

Feng Wang<sup>1,6</sup>, Yang Gao<sup>1,2,6</sup>, Situ Xue<sup>1,6</sup>, Luyao Zhao<sup>1</sup>, Huimin Jiang<sup>1</sup>, Tingting Zhang<sup>1</sup>, Yunxuan Li<sup>1</sup>, Chenxi Zhao<sup>1</sup>, Fan Wu<sup>3</sup>, Tana Siqin<sup>3</sup>, Ying Liu<sup>1</sup>, Jie Wu<sup>1</sup>, Yechao Yan<sup>1</sup>, Jian Yuan<sup>4,5\*</sup>, Jian-dong Jiang<sup>1\*</sup> and Ke Li<sup>1\*</sup>

**Supplementary information includes six Supplementary Figures and one Supplementary Tables.**

**Supplementary Figure 1.** *SCARB2* deletion decreased the proliferation, invasion and tumorsphere formation of HCC cells.

**Supplementary Figure 2.** *SCARB2* deletion reduces the tumour growth and metastasis.

**Supplementary Figure 3.** The effects of *Scarb2* deletion on the expression of MYC target genes.

**Supplementary Figure 4.** *SCARB2* disturbs HDAC3-mediated MYC acetylation.

**Supplementary Figure 5.** SPR assay examined the binding abilities of 10 candidate *SCARB2* inhibitors.

**Supplementary Figure 6.** Effects of PMB on HCC mice.

**Supplementary Table 1.** Clinical characteristics of patients in this study.

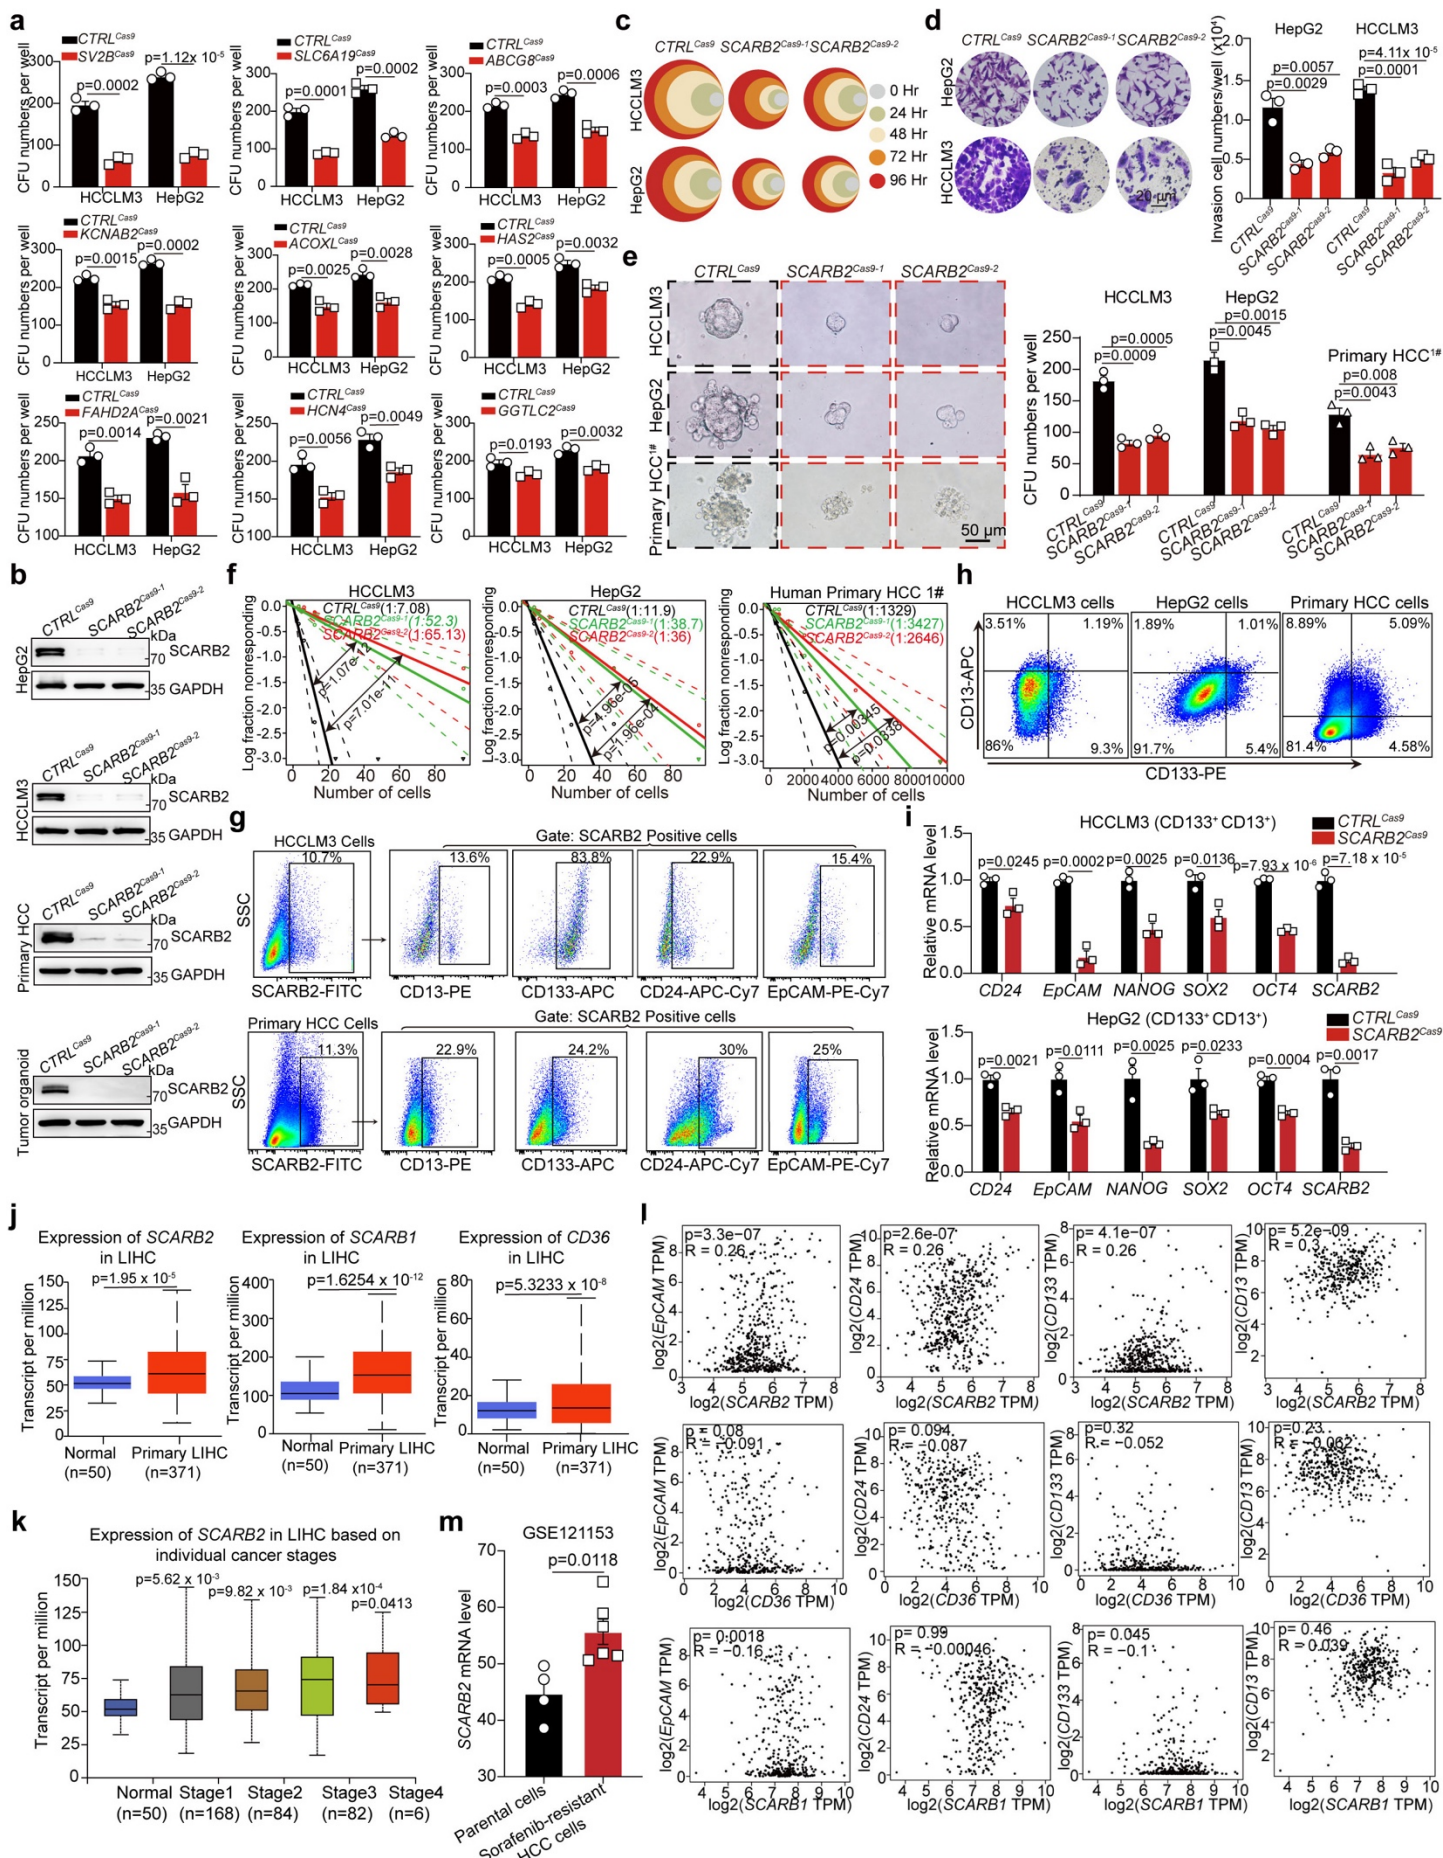

**Supplementary Figure 1. SCARB2 deletion decreased the proliferation, invasion and tumorsphere**

## formation of HCC cells.

**(a)** The effect of indicated gene knockout on the sphere-forming ability of HCC cells. **(b)** SCARB2 expression in the indicated groups were detected by western blotting. **(c)** Relative viability of HCCLM3 and HepG2 cells with or without SCARB2 deletion at the indicated times was measured by a CCK-8 assay. The colors represent different time points; the diameter indicates the relative cell viability. **(d)** The effect of SCARB2 knockout on the invasion of HepG2 and HCCLM3 cells. **(e)** Representative images and quantification of tumorspheres formed by HCCLM3, HepG2 or primary HCC cells with or without SCARB2 knockout. **(f)** The frequency of tumor-initiating cells of HCC cells with or without SCARB2 knockout was detected by *in vitro* limiting-dilution assays (n = 10 per group). **(g)** Flow cytometric analysis for detecting CD13, CD133, CD24, or EpCAM expression in SCARB2 positive cells from HCCLM3 cells or Primary HCC cells. **(h)** CD133<sup>+</sup>CD13<sup>+</sup> and CD133<sup>-</sup>CD13<sup>-</sup> subpopulations were sorted by flow cytometry from indicated cells. **(i)** Real-time PCR analysis of stem marker genes and stem transcription factor expression in CD133<sup>+</sup>CD13<sup>+</sup> and CD133<sup>-</sup>CD13<sup>-</sup> HCCLM3 cells. **(j)** Differential expression of SCARB2, SCARB1 and CD36 in primary HCC tissue samples (n=371) and normal liver tissue samples (n=50) were obtained and plotted using UALCAN platform <sup>1</sup> (<https://ualcan.path.uab.edu/analysis.html>). The center line indicates the median value; bounds of box = upper and lower quartiles; minima: bottom whiskers; maxima: top whiskers; **(k)** Expression of SCARB2 in HCC based on individual cancer stages were obtained and plotted using UALCAN platform <sup>1</sup> (<https://ualcan.path.uab.edu/analysis.html>). The center line indicates the median value, whiskers= min to max. Normal liver tissue samples (n=50); Stage 1 (n=168); Stage 2 (n=84); Stage 3 (n=82); Stage 4 (n=6); The center line indicates the median value; bounds of box = upper and lower quartiles; minima: bottom whiskers; maxima: top whiskers; **(l)** Pearson's correlation between SCARB2, SCARB1 or CD36 expression with the known CSC markers gene (CD133, EpCAM, CD24, or CD13) was analyzed on GEPIA <sup>2</sup> (<http://gepia.cancer-pku.cn>). Transcript per million, TPM. Each data point represents the value from an individual patient. **(m)** The expression of SCARB2 in sorafenib-resistant HCC cells (n=6) and their parental cells (n=4) from the GSE121153 dataset. **(a, b, c, d, e, g, h, i)** n = 3 biological repeats. Statistical significance was calculated by **(a, d, e, i, m)** two-tailed Student's t test; **(f)** one-sided extreme limiting dilution analysis. **(j, k)** Welch's T-test. **(l)** two-sided Pearson's correlation test; Data are presented as means ± S.E.M. Source data are provided as a Source Data file.

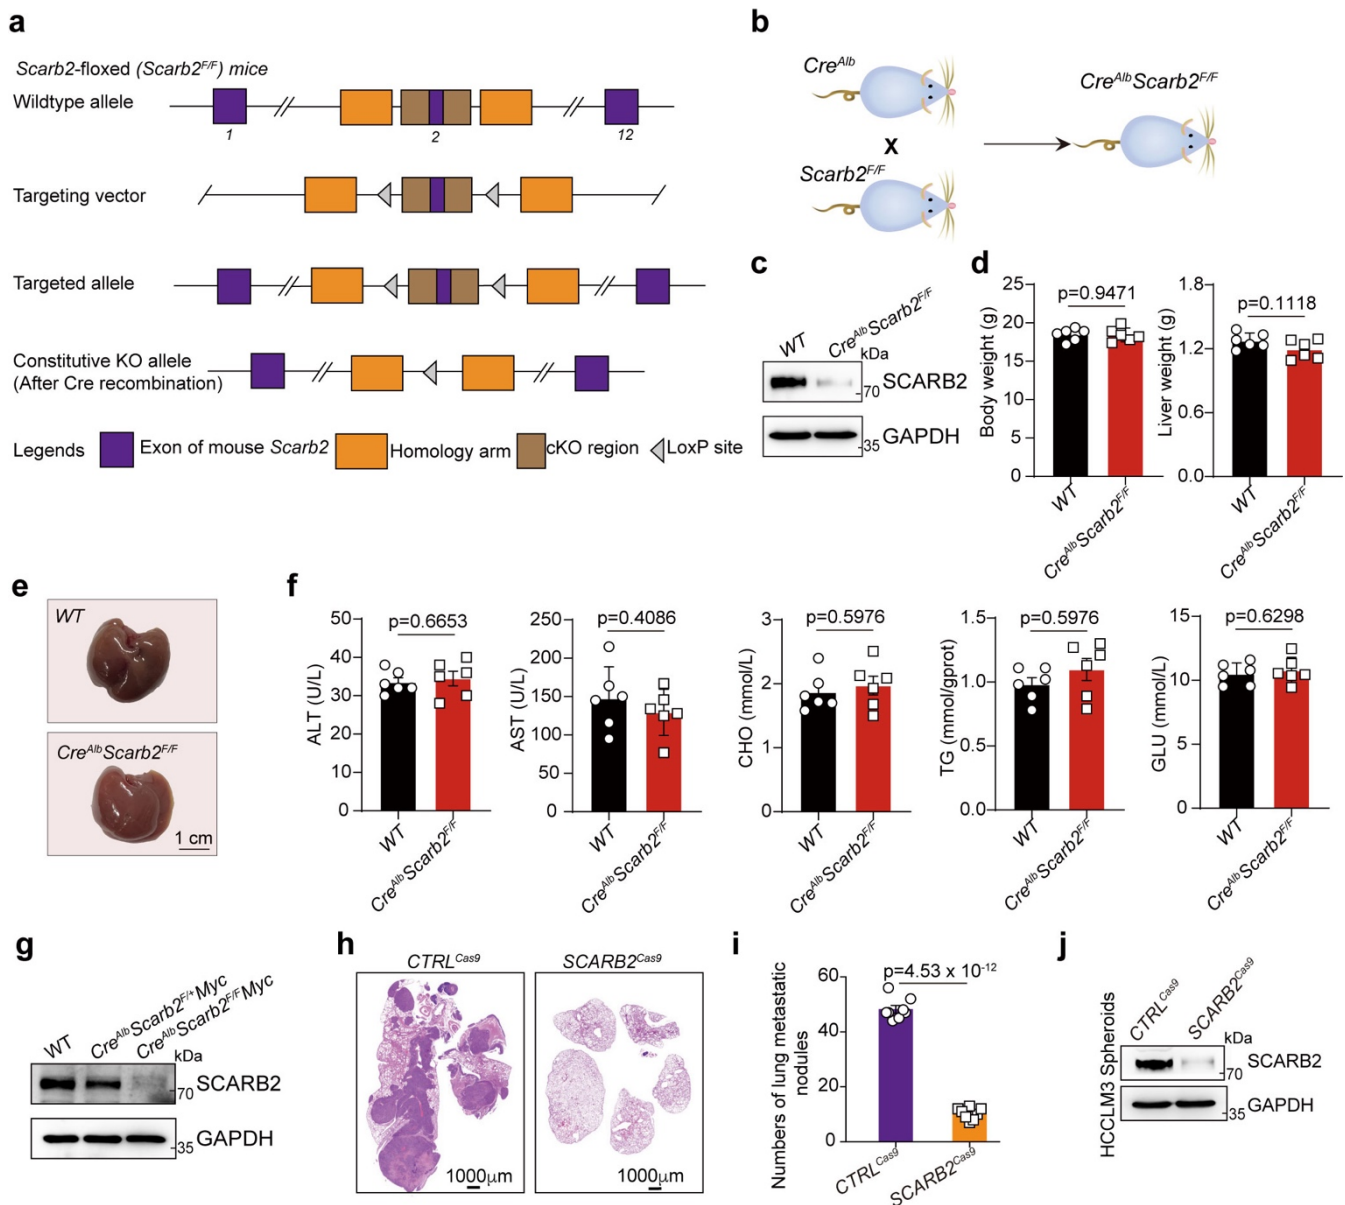

**Supplementary Figure 2. SCARB2 deletion reduces the tumour growth and metastasis.**

**(a-b)** The generating scheme used to generate mice with *SCARB2* targeting knockout. **(c)** The *SCARB2* expression in *Cre<sup>Alb</sup>Scarb2<sup>F/F</sup>* mice and WT mice. The body/liver weight **(d)**, representative liver pictures **(e)**, serum ALT, AST, CHO, GLU, or TG levels **(f)** of 10-week-old *Cre<sup>Alb</sup>Scarb2<sup>F/F</sup>* mice ( $n=6$  mice) and WT mice ( $n=6$  mice). Data are represented as means  $\pm$  S.E.M. Statistical significance was determined by two-tailed Student's *t* test. **(g)** The *SCARB2* expression in indicated mice were detected by western blotting. Data are representative images from three independent experiments. **(h)** Representative histological (H&E staining) images of lung metastatic tumors by in an *in vivo* metastasis assay. The number of metastatic lung foci detected in each group and histological staining were analyzed ( $n=8$  mice per group). **(i)** Numbers of metastatic lung foci in the indicated mice ( $n=8$  mice per group). Data are represented as means  $\pm$  S.E.M. Statistical significance was determined by two tailed Student's *t* test. **(j)** *SCARB2* expression in the indicated groups were detected by

western blotting. The data are presented as representative from 3 independent experiments. **(c, g, j)** n = 3 biological repeats. Statistical significance was calculated by **(d, f, i)** two-tailed Student's t test; Data are presented as means  $\pm$  S.E.M. Source data are provided as a Source Data file.

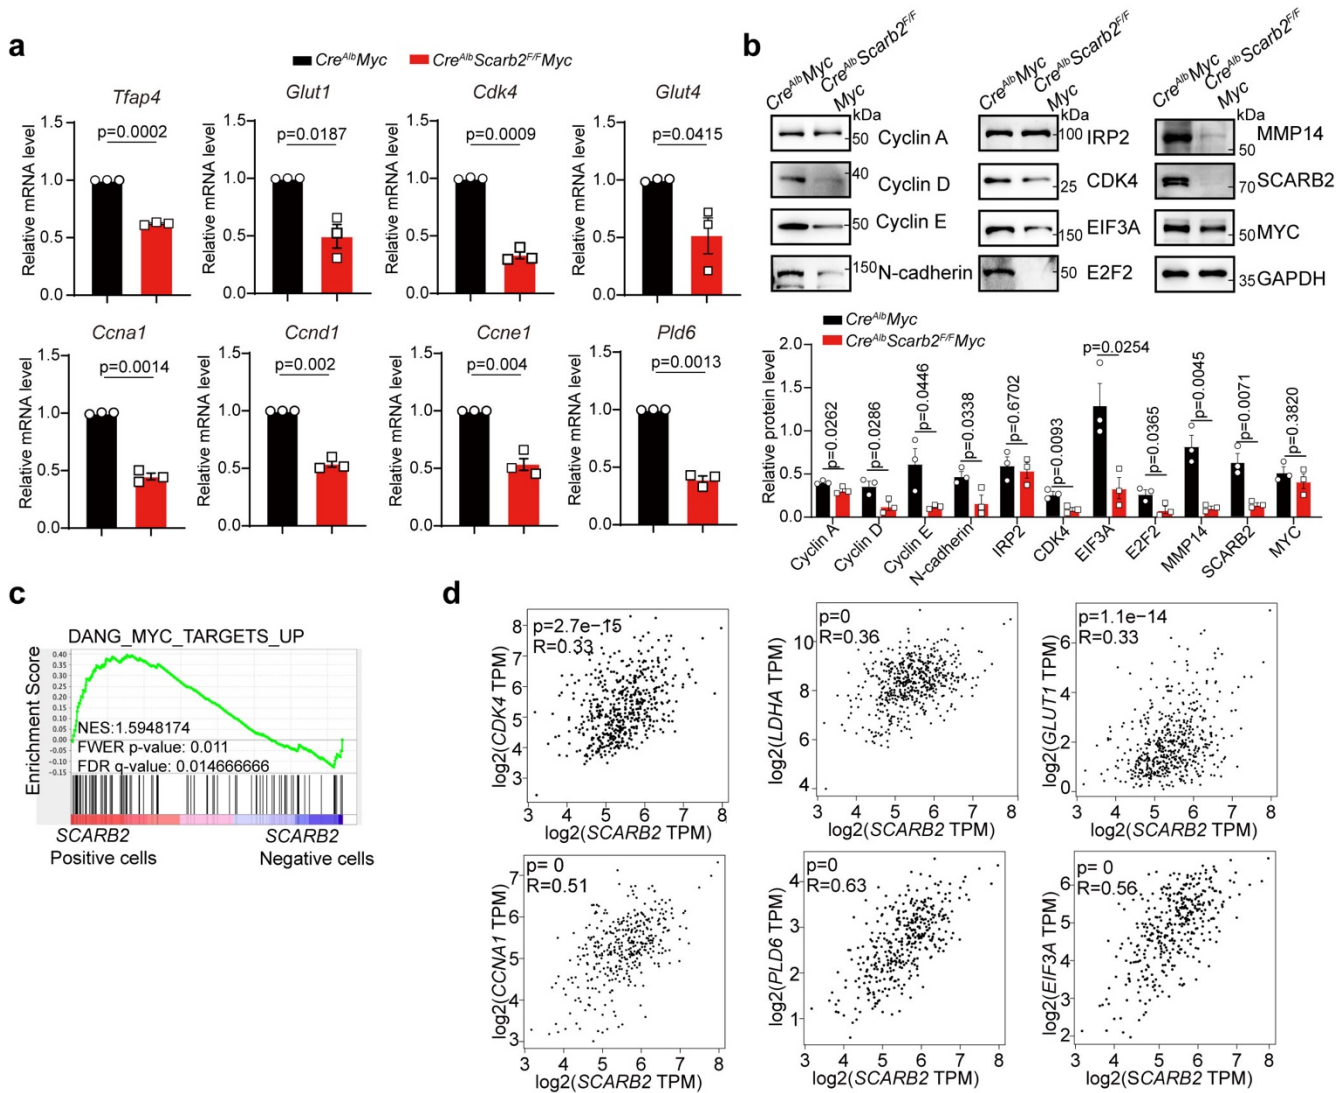

### Supplementary Figure 3. The effects of *Scarb2* deletion on the expression of MYC target genes.

**(a)** The mRNA levels of MYC target genes in HCC cells from indicated mice were detected by Real-time PCR.

**(b)** Protein levels of MYC target genes in the indicated mice ( $n=3$  per group) were detected by western blotting. The samples were derived from the same experiment and that gels/blots were processed in parallel. **(c)** GSEA results showing the enrichment of MYC target genes in *SCARB2* positive cells and *SCARB2* negative cells. P-value was determined by one-sided permutation test. Statistical adjustments were made for multiple comparisons. **(d)** Pearson's correlation between *SCARB2* with MYC target genes *CDK4*, *LDHA*, *GLUT1*, *CCNA1*, *PLD6*, or *EIF3A* using samples from GEPIA <sup>2</sup> (<http://gepia.cancer-pku.cn>). Each data point represents the value from an individual patient. **(a, b)**  $n = 3$  biological repeats. Statistical significance was calculated by **(a, b)** two-tailed Student's t test; **(d)** two-sided Pearson's correlation test; Data are presented as means  $\pm$  S.E.M. Source data are provided as a Source Data file.

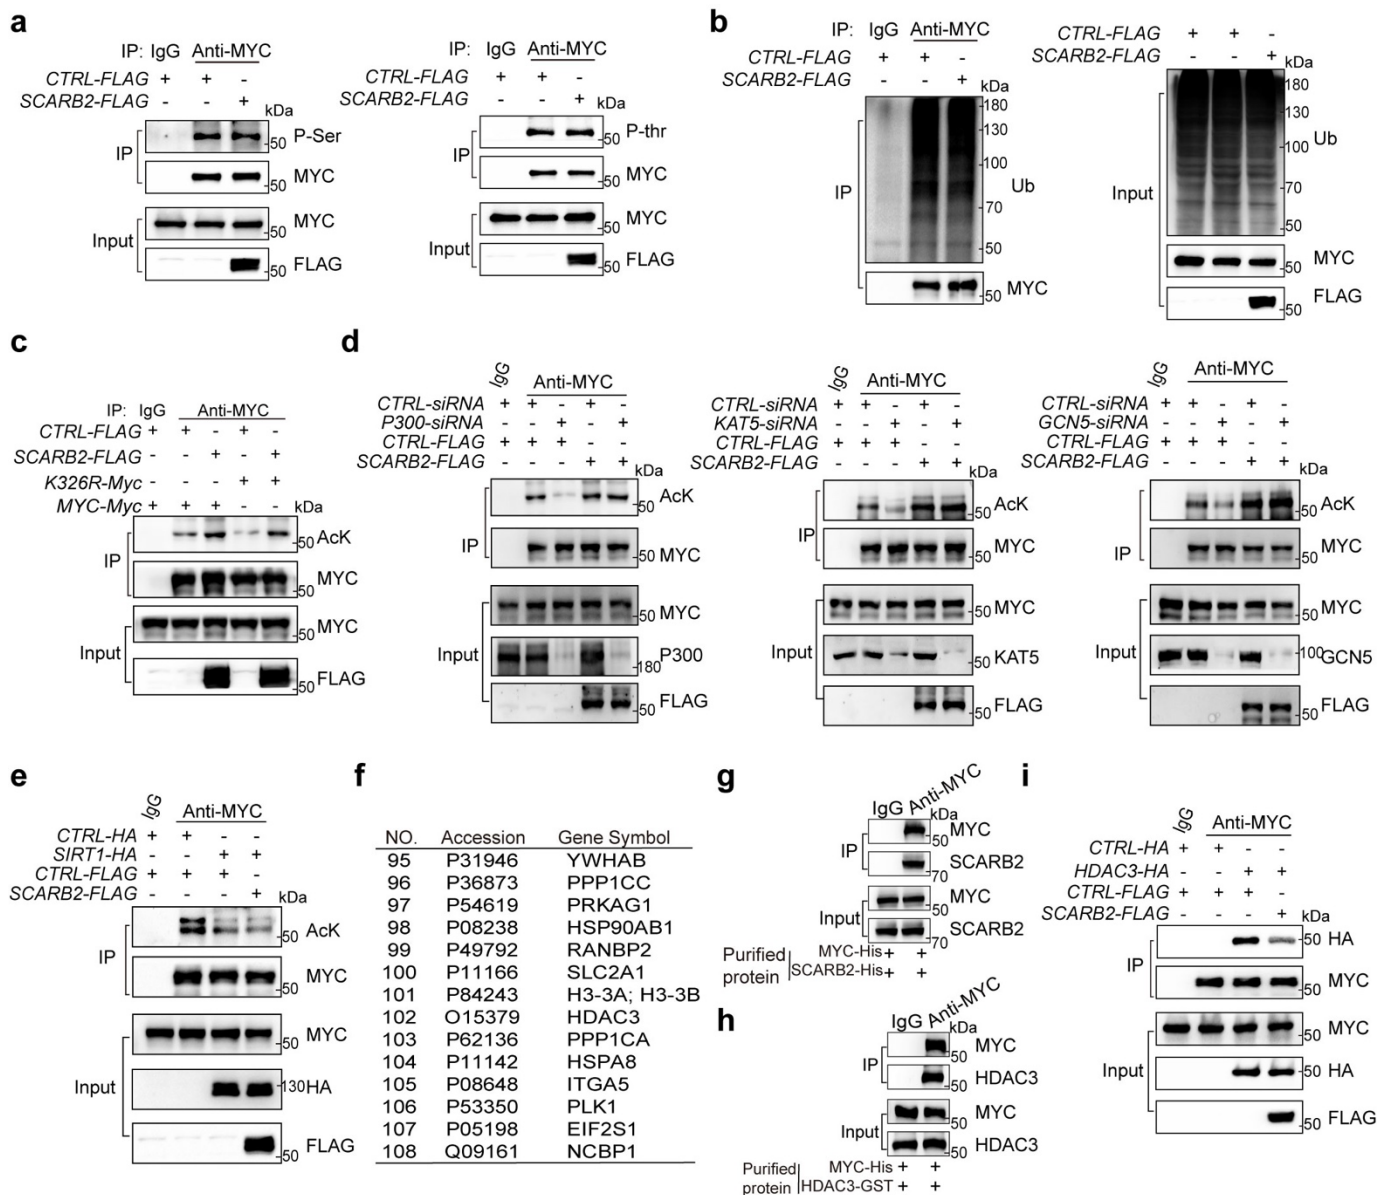

### Supplementary Figure 4. SCARB2 disturbs HDAC3-mediated MYC acetylation.

(a) The effects of *SCARB2* overexpression on the serine and threonine phosphorylation of MYC are assessed by Co-Immunoprecipitation analyses. (b) The effects of *SCARB2* overexpression on the ubiquitination of MYC are assessed by Co-Immunoprecipitation analyses. (c) Effects of *SCARB2* on the acetylation of MYC K326R mutants. HEK 293T cells were transfected with the indicated mutants of MYC, and acetylation of MYC was detected by Co-IP. (d) The effects of *SCARB2* overexpression on the acetylation of MYC in HepG2 cells with or without *p300*, *KAT5*, or *GCN5* depletion. HepG2 cells were transfected with the indicated plasmids or siRNAs, and the acetylation of MYC was detected by Co-IP assays. (e) The effects of *SCARB2* overexpression in HepG2 cells on the acetylation of MYC with or without *SIRT1* overexpression. HepG2 cells were transfected with the indicated plasmids, and the acetylation of MYC was detected by Co-IP assays. (f) MS analyzed the interaction proteins of *SCARB2* in HCCLM3 cells. (g) *In vitro* interaction assays detect the direct interaction of MYC and

SCARB2. **(h)** *In vitro* interaction assays detect the direct interaction of MYC and HDAC3. **(i)** SCARB2 overexpression decreased the interaction of HDAC3 and MYC. CTRL<sup>OE</sup> and SCARB2<sup>OE</sup> cell extracts were immunoprecipitated with an anti-MYC Ab and immunoblotted with an anti-HA Ab. **(a, b, c, d, e, g, h, i)** n = 3 biological repeats. Source data are provided as a Source Data file.



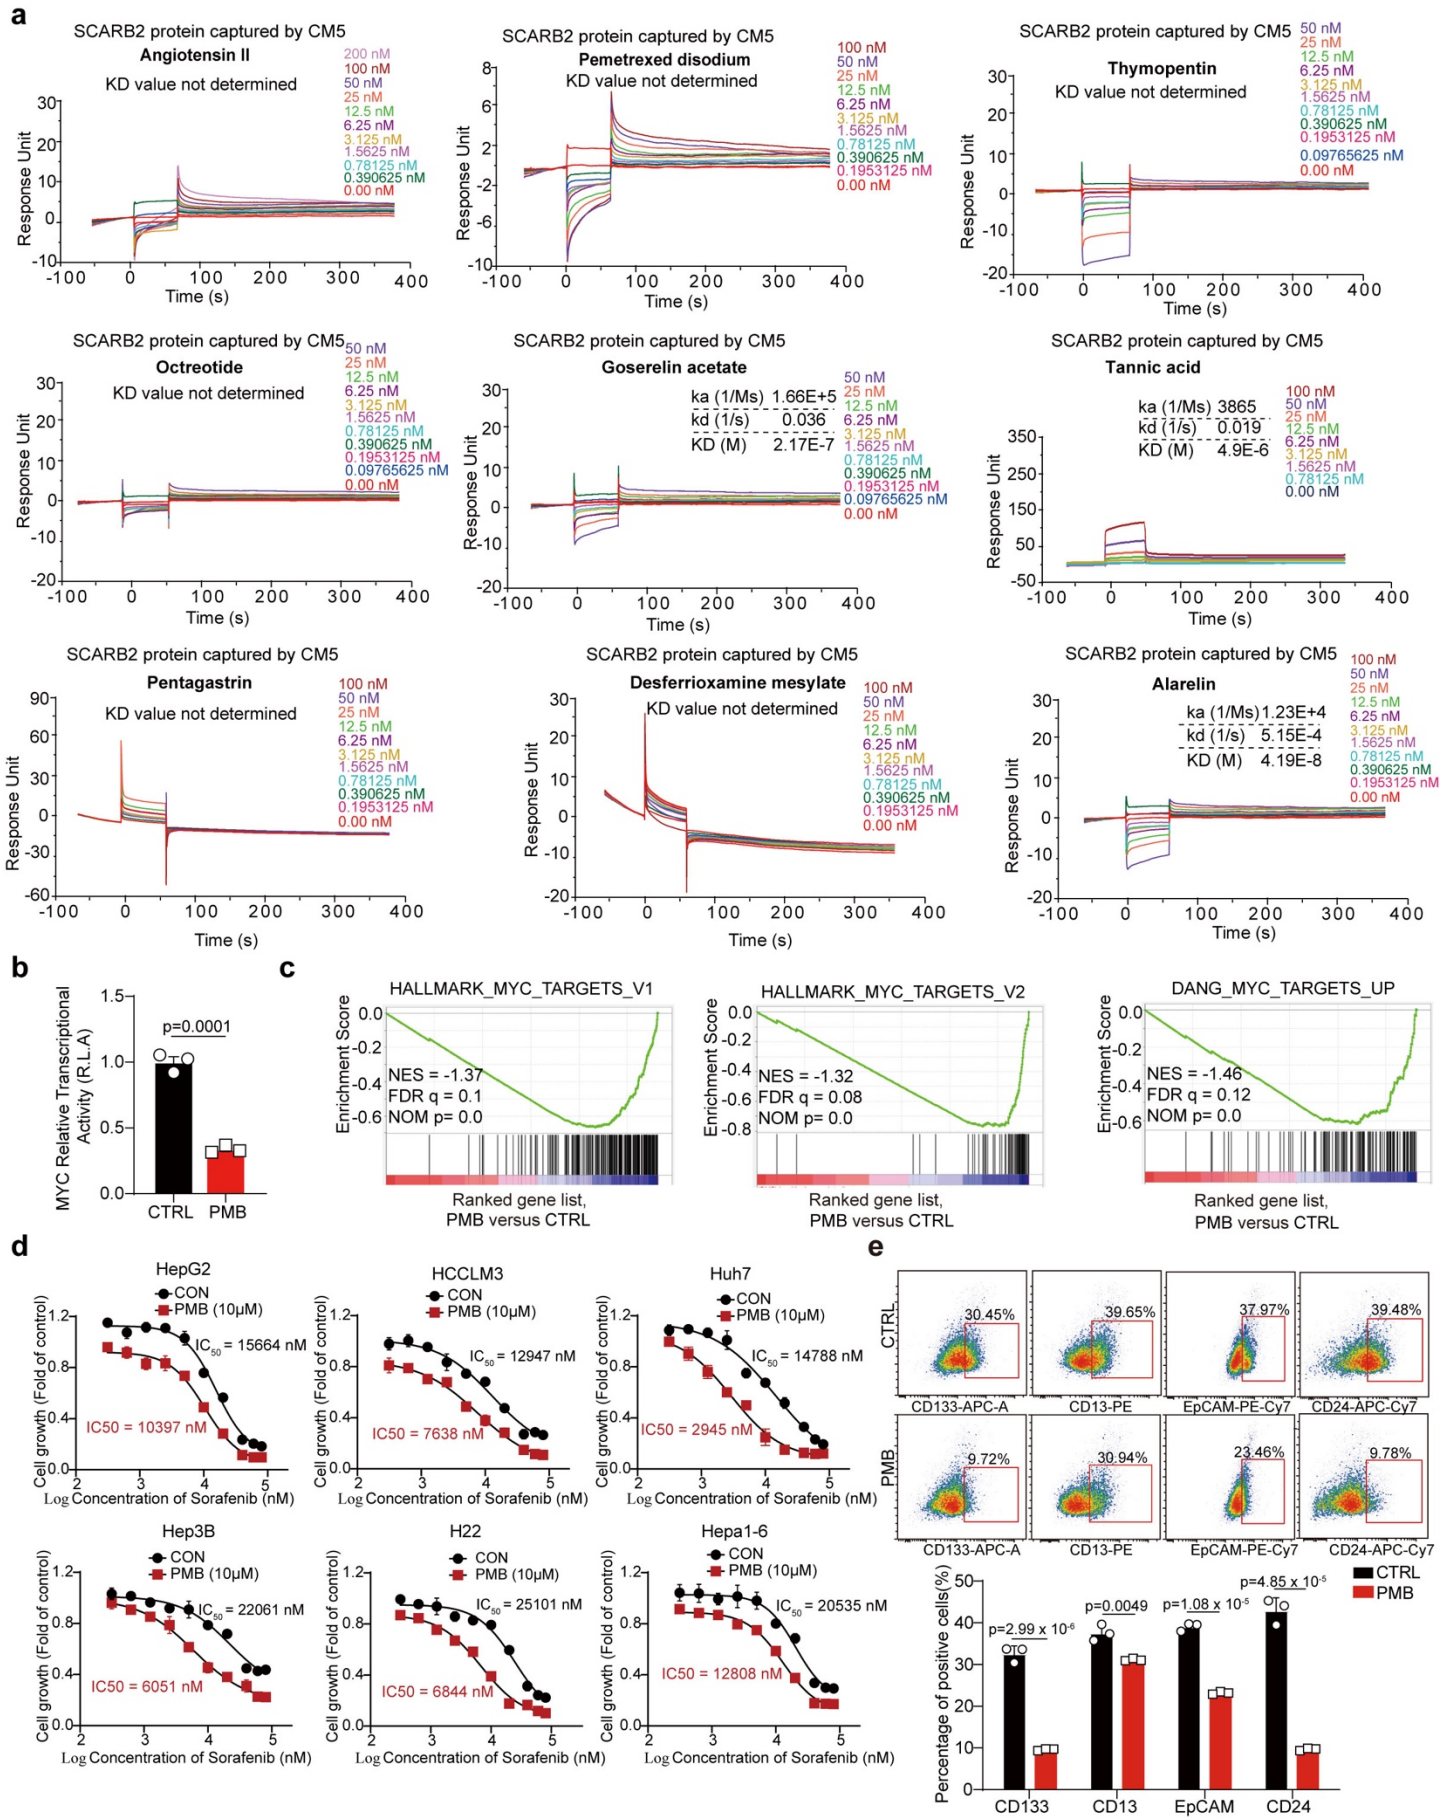

Supplementary Figure 5. SPR assay examined the binding abilities of 10 candidate SCARB2 inhibitors.

**(a)** Kinetic interaction of 10 candidate inhibitors and SCARB2 was determined by surface plasmon resonance (SPR) analyses. The indicated concentrations of SCARB2 inhibitors are passed over immobilized SCARB2 on CM5 chips. The affinity constants are evaluated using BIA evaluation software. **(b)** Transcriptional activity of MYC in HepG2 cells treated with or without PMB. Data are means  $\pm$  S.E.M of 3 independent experiments. Statistical significance was determined by two-tailed Student's t test. **(c)** GSEA showed global downregulation of MYC target genes in PMB-treated vs. vehicle-treated HepG2 cells. P-value was determined by one-sided permutation test. Statistical adjustments were made for multiple comparisons. **(d)** Effects of PMB on sorafenib sensitivity in the indicated HCC cells. The data shown are a summary of the IC<sub>50</sub> values for sorafenib in the indicated cell lines. **(e)** Flow cytometry analysis for detecting CD133, CD13, EpCAM, or CD24 expression in primary HCC cells with or without PMB treatment. Data are representative Flow cytometry plots of CD133, CD13, EpCAM, and CD24 staining. **(b, d, e)** n = 3 biological repeats. Statistical significance was calculated by **(b, e)** two-tailed Student's t test; Data are presented as means  $\pm$  S.E.M. Source data are provided as a Source Data file.

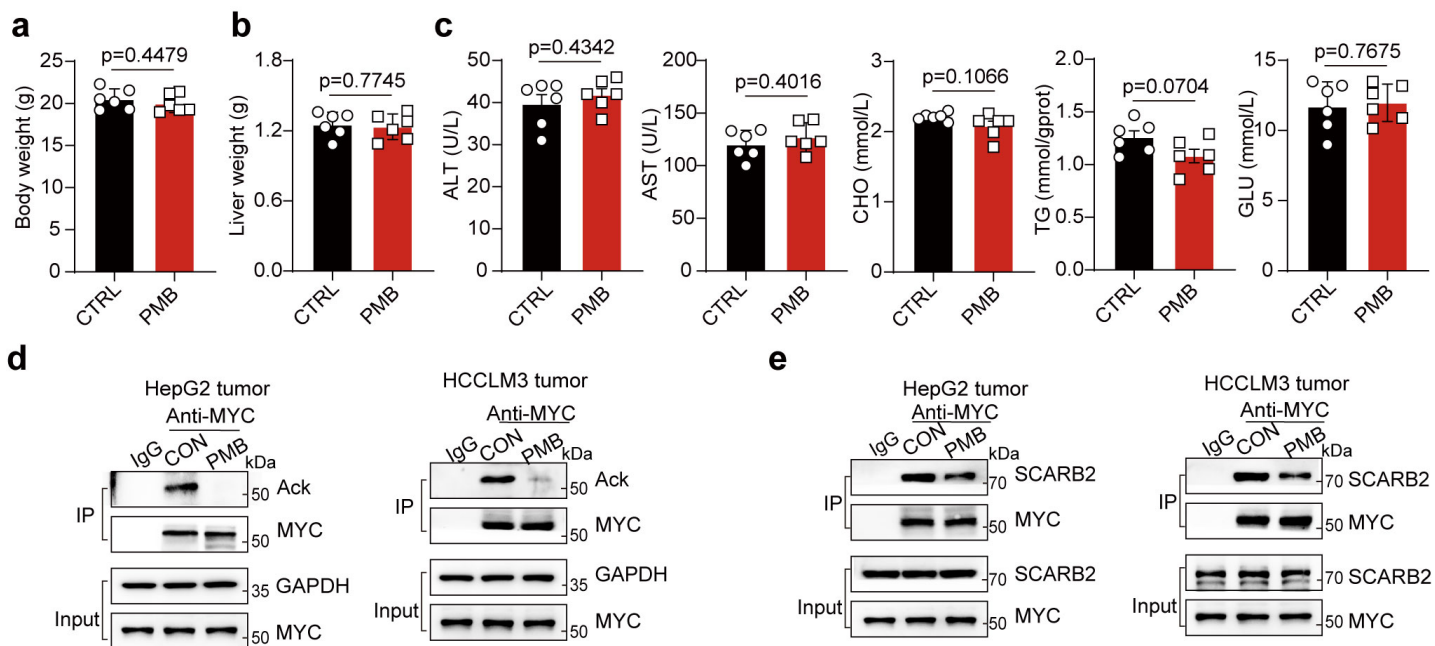

**Supplementary Figure 6. Effects of PMB on HCC mice.**

**(a-c)** The body weights **(a)**, liver weight **(b)**, serum ALT, AST, CHO, GLU, or TG levels **(c)** of HepG2 CDX mouse with or without PMB treatment ( $n = 6$  mice per group). Data are represented as means  $\pm$  S.E.M. Statistical significance was determined by two tailed Student's *t* test. **(d)** Effects of PMB on MYC acetylation *in vivo*. Tumor extracts from PMB-treated mice were immunoprecipitated with an anti-MYC Ab and immunoblotted with an anti-Ack ab. Data are representative images from three independent experiments. **(e)** PMB disrupted the SCARB2-MYC interaction *in vivo*. Tumor lysates from mice treated as indicated were subjected to IP with an anti-MYC Ab and immunoblotted with an anti-SCARB2 Ab. Data are representative images from three independent experiments. Source data are provided as a Source Data file.

**Supplementary Table 1. Clinical characteristics of patients in this study.**

| <b>Patient NO.</b> | <b>Gender</b> | <b>Age (years)</b> | <b>Subtype</b> | <b>Hep B</b> | <b>Hep C</b> | <b>Fatty liver</b> | <b>Diabetes</b> | <b>Hypertension</b> |
|--------------------|---------------|--------------------|----------------|--------------|--------------|--------------------|-----------------|---------------------|
| 1                  | Male          | 67                 | Primary HCC    | Positive     | Negative     | NO                 | NO              | NO                  |
| 2                  | Male          | 70                 | Primary HCC    | Positive     | Negative     | NO                 | YES             | YES                 |
| 3                  | Male          | 55                 | Primary HCC    | Positive     | Negative     | YES                | NO              | YES                 |
| 4                  | Male          | 68                 | Primary HCC    | Positive     | Negative     | NO                 | NO              | NO                  |
| 5                  | Female        | 54                 | Primary HCC    | Positive     | Negative     | NO                 | NO              | YES                 |
| 6                  | Female        | 67                 | Primary HCC    | Positive     | Negative     | NO                 | NO              | YES                 |
| 7                  | Female        | 70                 | Primary HCC    | Positive     | Negative     | NO                 | NO              | NO                  |
| 8                  | Female        | 49                 | Primary HCC    | Positive     | Negative     | NO                 | NO              | NO                  |

## Supplementary References

1. Chandrashekar DS, *et al.* UALCAN: An update to the integrated cancer data analysis platform. *Neoplasia* **25**, 18-27 (2022).
2. Tang Z, Li C, Kang B, Gao G, Li C, Zhang Z. GEPIA: a web server for cancer and normal gene expression profiling and interactive analyses. *Nucleic Acids Res* **45**, W98-W102 (2017).
