# Supplementary material for: SCARB2 drives hepatocellular carcinoma tumor initiating cells via enhanced MYC transcriptional activity
Source: Springer Nature journal article supplement (doi:10.1038/s41467-023-41593-z), 2023-09-22
Supplement: 41467_2023_41593_MOESM3_ESM.pdf [file 41467_2023_41593_MOESM3_ESM.pdf]

**Title:** Supplementary Data 1

**Description:** The information of human CRISPR/Cas9 metabolic gene knockout library.

**Title:** Supplementary Data 2

**Description:** The analysis of metabolic CRISPR library screen by MAGeCK.
